# Supplementary material for: Resilient T cell responses to B.1.1.529 (Omicron) SARS-CoV-2 variant
Source: bioRxiv or medRxiv preprint supplement (doi:10.1101/2022.01.16.22269361), 2022-01-16
Supplement: Supplementary file [file media-1.pdf]

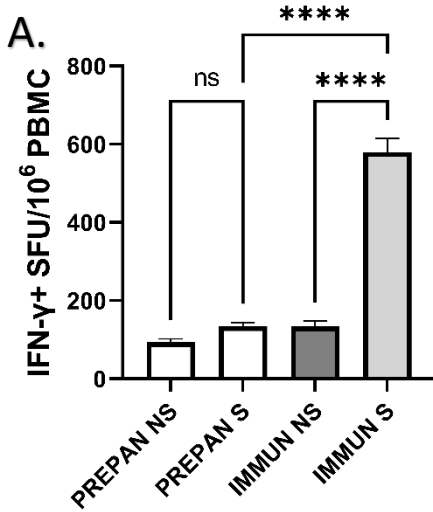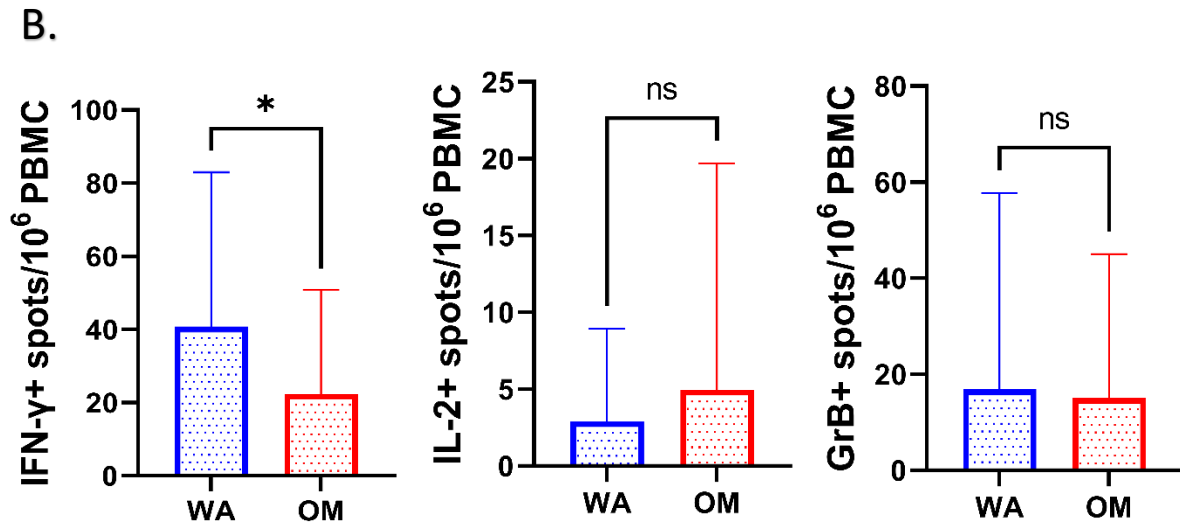

**Supplemental Figure 1. A)**  $10^6$  PBMCs per well were cultured without peptide stimulation (NS) or stimulated with Spike peptide pools from USA-WA1/2020 for 42h, IFN- $\gamma$  response was measured by FLUORISpot. Prepandemic samples N=32, immunized samples N=326. Data presented as mean  $\pm$  standard error of the mean. Kruskal-Wallis test with Dunn's correction for multiple comparisons. **B).** Prepandemic samples showed higher IFN- $\gamma$  responses, but not IL-2 and GrB in response to USA-WA1/2020 peptide pool compared to Omicron. N=32. Data presented as mean  $\pm$  standard error of the mean. Two-tailed Wilcoxon rank test. For all statistical differences \* $p$ <0.05, \*\* $p$ <0.01, \*\*\* $p$ <0.001. \*\*\*\* $p$ <0.0001.

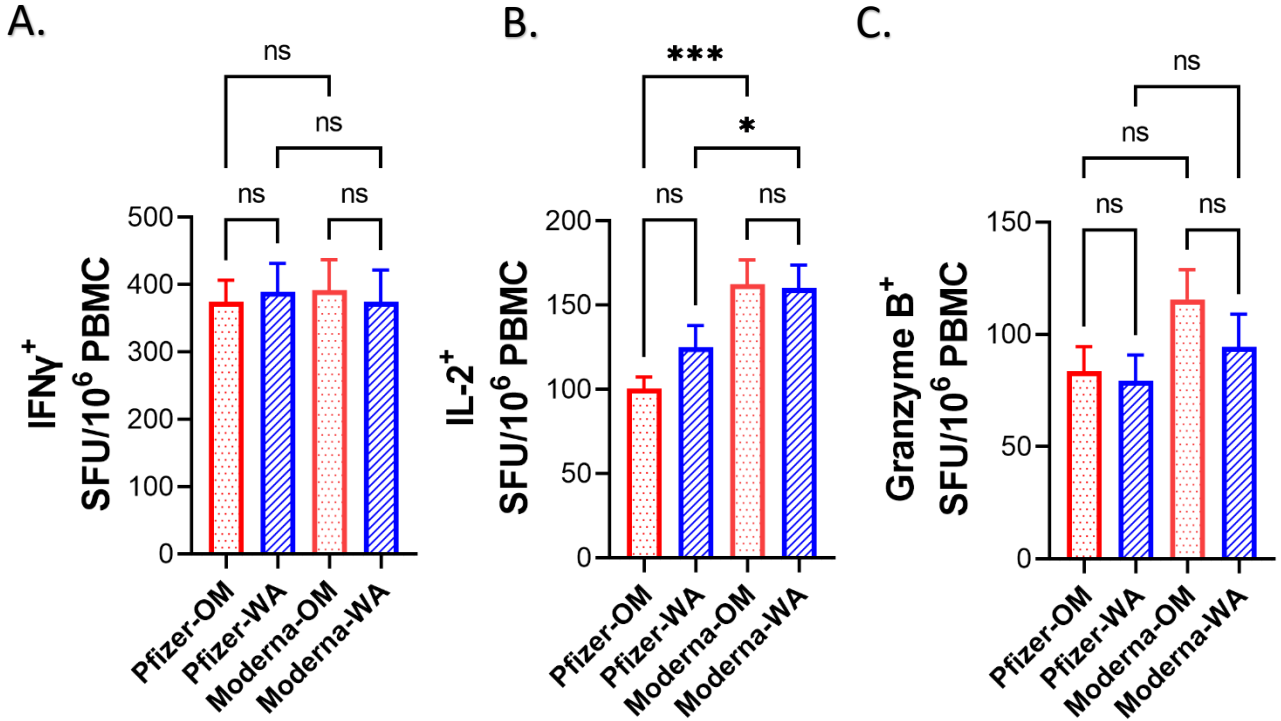

**Supplemental Figure 2. Reduced IL-2 responses in recipients of Pfizer mRNA SARS-Cov-2 vaccines** **A)** No difference in number of IFN- $\gamma$  SFU between recipients of Pfizer and Moderna manufactured mRNA vaccines. **B)** IL-2 SFU were reduced in recipients of Pfizer's mRNA vaccines in response to both USA-WA1/2020 and Omicron peptide pool. **C)** No difference in number of GrB SFU between groups. Pfizer n=139, Moderna n=93. Data presented as mean  $\pm$  standard error of the mean. Kruskal-Wallis test with Dunn's correction for multiple comparisons

| Marker | Fluorochrome | Clone                |
|--------|--------------|----------------------|
| CD16   | PerCPCY5.5   | 3G8                  |
| CD3    | AF488        | UCHT1                |
| CD4    | SB550        | SK3                  |
| CD8    | AF700        | SK1                  |
| CD45RA | BV570        | HI100                |
| CD28   | PEdazzle994  | CD28.2               |
| CD95   | BV421        | DX2                  |
| CCR7   | PECy7        | G043H7               |
| OX-40  | PE           | Ber-ACT35<br>(ACT35) |
| CD137  | APC          | 4-1BB                |
| CD57   | BV605        | QA17A04              |

**Supplemental Table 1. Antibodies used for flow cytometric staining**

A.

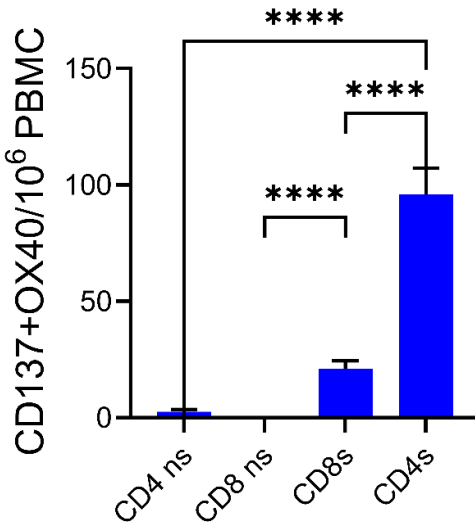

B.

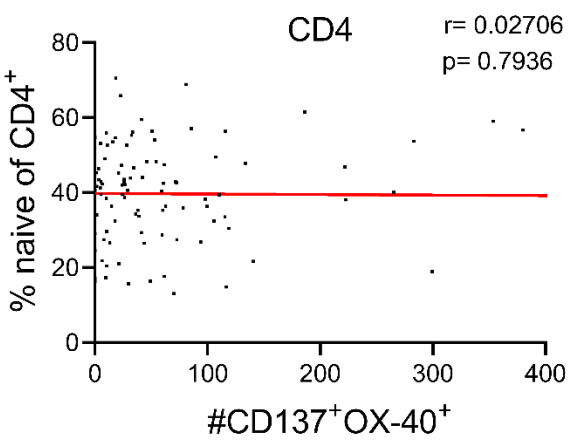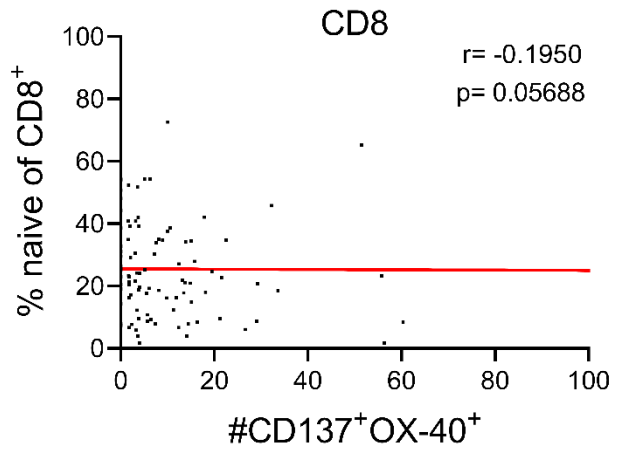

C.

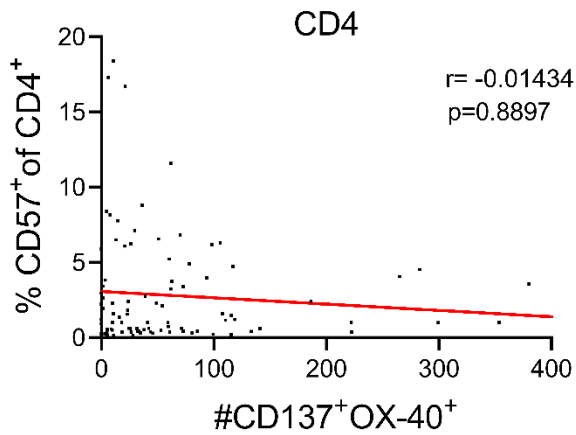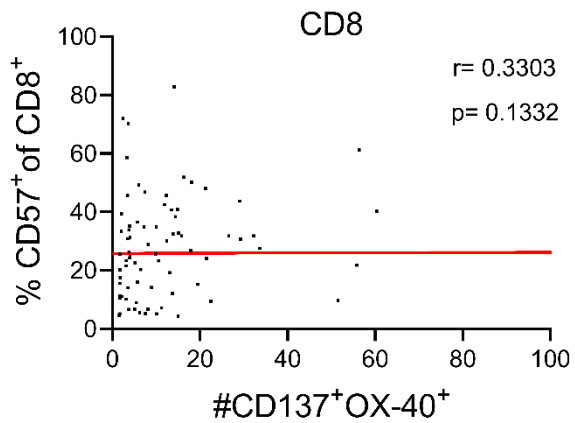

**Supplemental Figure 3. A)** Spike peptide pool induces expression of CD137 and OX-40 on T cells, n=96. Data presented as mean  $\pm$  standard error of the mean. Kruskal-Wallis test with Dunn's correction for multiple comparisons **B)** No correlation with antigen specific (CD137+OX-40+) cells and naïve phenotype of T cells or **C)** senescence marker CD57, n=96, nonparametric Spearman correlation, two tailed p-values. Data presented as individual values.
